# Supplementary material for: Visual Perception Optimization of Residential Landscape Spaces in Cold Regions Using Virtual Reality and Machine Learning
Source: MDPI journal article supplement (doi:10.3390/land13030367), 2024-03-14
Supplement: s1 [file s1]

---

## Questionnaire on SD for Visual Perception of landscape leisure spaces

### between Houses

1. Gender [Single choice] \* ☐ Male ☐ Female
2. Your age [Single choice] \* ☐ Under 18 years old ☐ 19-35 years old ☐ 36-59 years old ☐ 60 years old or older
3. What is the average length of time you spend on outdoor recreation at home? [Single choice]  
☐ Under 30 minutes ☐ 30 minutes-1 hour ☐ 1-2 hours ☐ 2-3 hours ☐ More than 3 hours
4. What is the average number of times per week you recreate outdoors? [Single choice]  
☐ Once or none ☐ 2-3 times ☐ 3-5 times ☐ Almost every day
5. How do you perceive the visual experience of the landscape leisure space between houses you are in now? (The overall environment you see in the residential area) [Single choice] \*  
Very dissatisfied ☐ 1 ☐ 2 ☐ 3 ☐ 4 ☐ 5 Very satisfied
6. Width to Height ratio (D/H) of the space you are currently living in [optional] \*  
高宽比 H/D 示意图: definition: Spatial aspect ratio diagram.

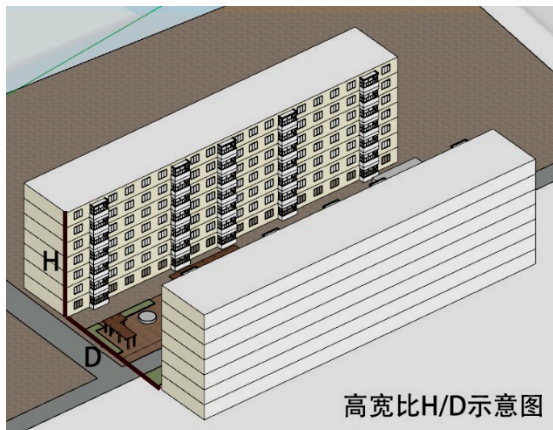

Very Narrow ☐ 1 ☐ 2 ☐ 3 ☐ 4 ☐ 5 Very Wide

7. Difference in roof height of the landscape leisure space between houses you are in (small/large) [Single choice]\*

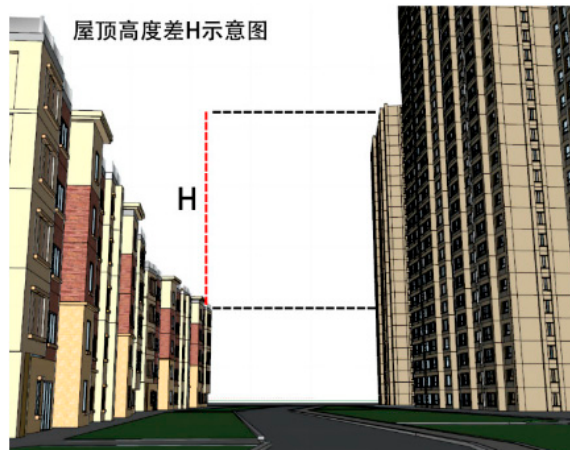

屋顶高低差 H 示意图: definition: Roof height difference H diagram

Very Low ☐1 ☐2 ☐3 ☐4 ☐5 Very High

8. The degree of openness of the sky of the landscape leisure space in your house (small/large) [Single choice]\*

天空开阔度小: definition: The open sky is small.

天空开阔度大: definition: The open sky is big.

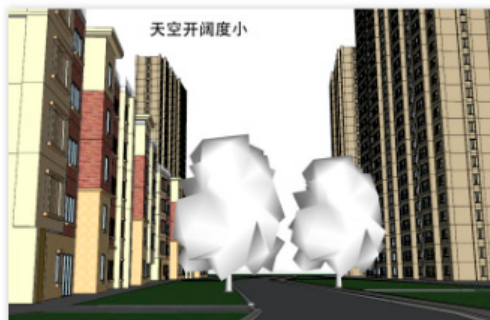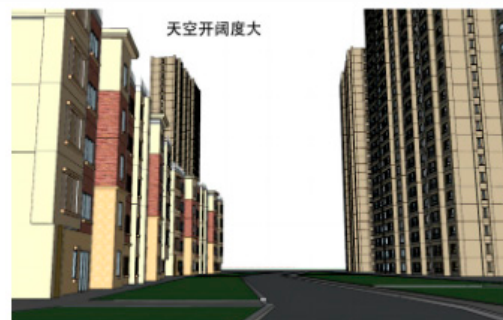

Very small ☐1 ☐2 ☐3 ☐4 ☐5 Very big

9. Distance from your current landscape leisure space to the residential building (far/near) [Single Choice]\*

楼到路的距离示意图

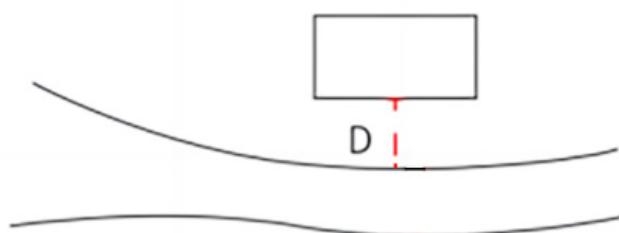

楼到路的距离示意图: definition: Distance diagram from building to road.

Very near ☐1 ☐2 ☐3 ☐4 ☐5 Very far

10. The angle of orientation between the landscape leisure space in your house and the buildings on either side of it (small/large) [optional]\*

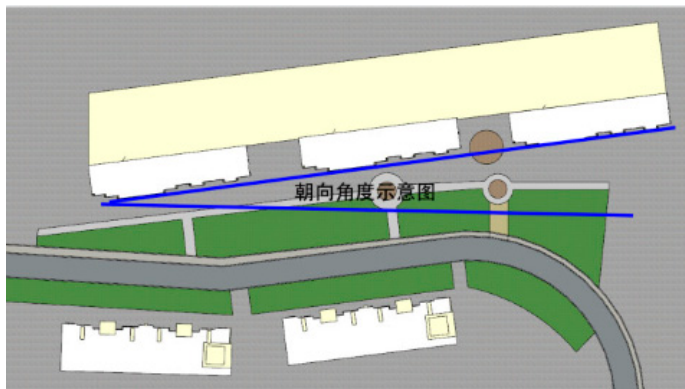

朝向角度示意图: definition: Orientation diagram.

Very low ○1 ○2 ○3 ○4 ○5 Very high

11. Density of vegetation in your current landscape leisure space (low/high) [Single choice] \* Very low ○1 ○2 ○3 ○4 ○5 Very high

12. Height of plants in your current landscape leisure space (low/high) [optional] \* Very low ○1 ○2 ○3 ○4 ○5 Very high

13. Color of the façade of your current landscape leisure space (cool/warm) [Single choice] \*

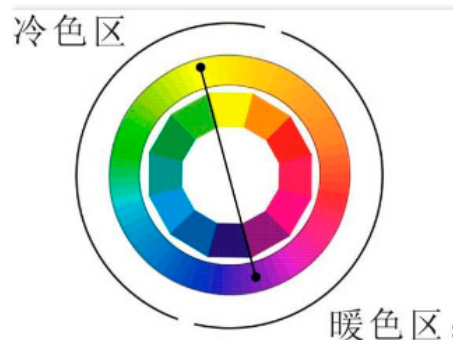

冷色区: definition: Cool zone. 暖色区: definition: Warm zone.

Very cold ○1 ○2 ○3 ○4 ○5 Very warm

14. Color saturation level of the building façade of the landscape leisure space you are currently living in (low/high) [optional]\*

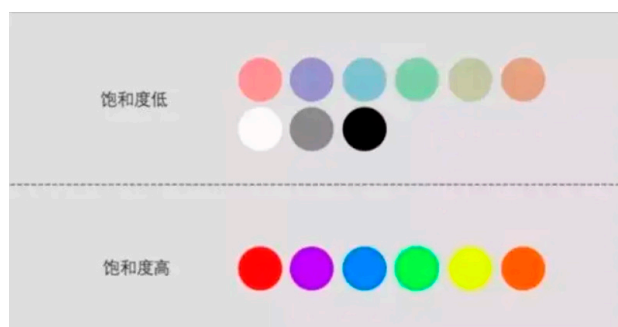

饱和度低: definition: Low saturation. 饱和度高: definition: High saturation.

Very low ○1 ○2 ○3 ○4 ○5 Very high

15. The color of the façade of the landscape leisure space you are currently living in (dark/light) [Single choice]\*

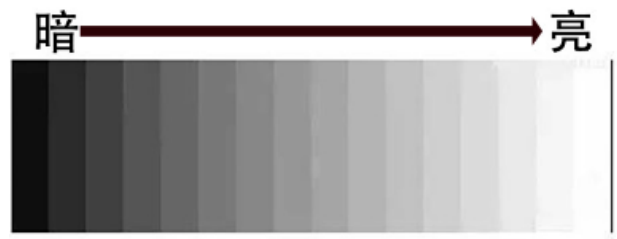

暗: definition: dark. 亮: definition: bright.

Very dark ○1 ○2 ○3 ○4 ○5 Very bright

16. The color of the floor of the landscape leisure space in your house is cold or warm (cool/warm).

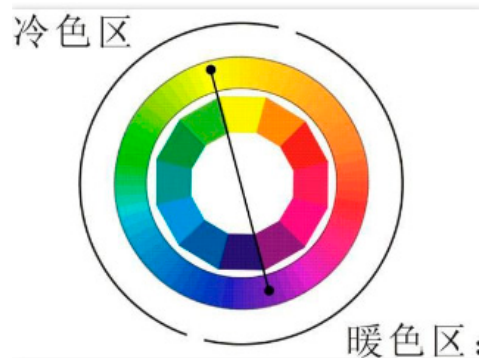

冷色区: definition: Cool zone. 暖色区: definition: Warm zone.

Very cold ○1 ○2 ○3 ○4 ○5 Very warm

17. Saturation of the color of the floor of the landscape leisure space in your house (low/high)

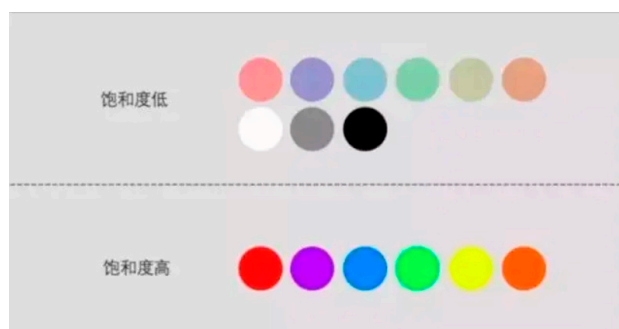

饱和度低: definition: Low saturation. 饱和度高: definition: High saturation.

Very low ○1 ○2 ○3 ○4 ○5 Very high

18. Darkness or darkness of the floor of the landscape leisure space in your house (dark/light)

暗: definition: dark.    亮: definition: bright.

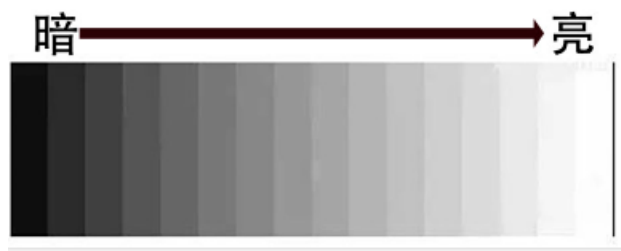

Very dark ○1 ○2 ○3 ○4 ○5 Very bright

19. Number of colors in the landscape leisure space of your house (less/more)

颜色数量少: definition: Few colors.    颜色数量多: definition: Large number of colors.

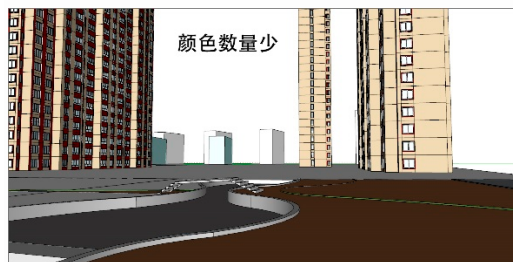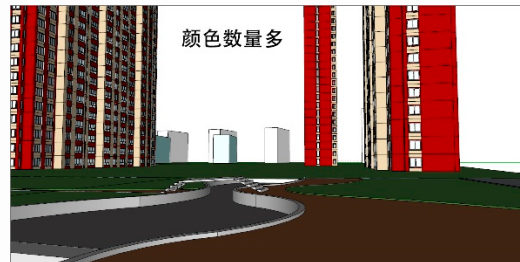

Very little ○1 ○2 ○3 ○4 ○5 Very much

20. Difference in the overall color of the landscape leisure space in your current home (small/large)

Very small ○1 ○2 ○3 ○4 ○5 Very large
